# Supplementary material
Source: PubMed Central journal article supplement (PMC3517020)
Supplement: NIHMS414796-supplement-01.pdf [file NIHMS414796-supplement-01.pdf]

Type of file: figure

Label: Supplementary Figure 1

Filename: 3\_Supplemental\_Figure\_S1\_12082011..tif

A

| Search                     |                 | One-step                      | Two-step                       |
|----------------------------|-----------------|-------------------------------|--------------------------------|
| Primary Search             | <i>Spectra</i>  | 87469                         | 87469                          |
|                            | <i>Proteins</i> | 3,374852 (Target-Decoy)       | 1,687426 (Target)              |
| Secondary Search           | <i>Spectra</i>  | -                             | 87469                          |
|                            | <i>Proteins</i> | -                             | 148620 (Target-Decoy)          |
| <b>Results</b>             |                 |                               |                                |
| Data Level                 | Local FDR       |                               |                                |
| Total MS/MS matched        | 5%              | 8163                          | 10942                          |
| Distinct peptide sequences | 5%              | 2111 (2017 + 94) <sup>+</sup> | 2739 (2599 + 140) <sup>+</sup> |
| Proteins matched           | 5%              | 622 (575 + 46) <sup>+</sup>   | 751 (676 + 75) <sup>+</sup>    |

B

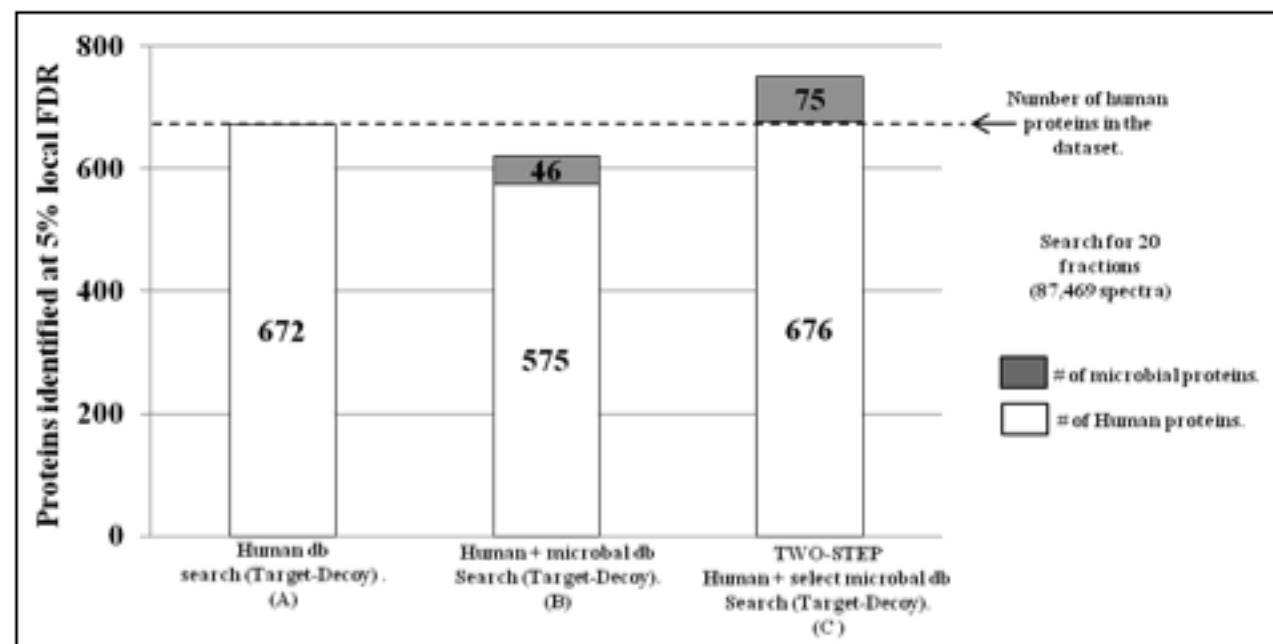

Type of file: figure

Label: Supplementary Figure 2

Filename: 4\_Supplemental\_Figure\_S2.jpg
